# Supplementary material for: Prenatal exposure to cannabis and maternal and child health outcomes: a systematic review and meta-analysis
Source: PubMed Central journal article supplement — BMJ Open. 2016 Apr 1;6(4):e009986. doi: 10.1136/bmjopen-2015-009986 (PMC4823436; doi:10.1136/bmjopen-2015-009986), 2016-04-01
Supplement: bmjopen-2015-009986supp1.pdf [file bmjopen-2015-009986supp1.pdf]

## Supplement 1

### Search Strategy

The following databases will be searched from inception to the latest issue: PubMed, EMBASE, POPLINE, Ovid/Medline, CINAHL/Ebsco, PsychInfo/Ebsco, Web of Science, and Sociological abstracts.

The concepts to be searched will be based on the following PubMed search strategy which will be adapted appropriately for use in other databases.

Search terms were used in two groups and included: cannabis, marijuana, medical marijuana, marijuana smoking, marijuana abuse, cannabinoids, endocannabinoids, (group 1) AND infant, newborn, embryonic and fetal development, embryology, infant mortality, maternal mortality, prenatal injuries, child development, pregnancy, female urogenital diseases and pregnancy complications, breast feeding, maternal-child nursing, postpartum period (group 2) AND Humans. All MeSH terms were included within the search as well as the free text terms: marihuana, bhang, hemp, hashish, delta-9-tetrahydrocannabinol, low birth weight, small for gestational age.

1. ("cannabis"[Mesh]
2. "cannabis"[tw]
3. "cannabis"[All Fields]
4. "marijuana"[All Fields]
5. "marihuana"[All Fields]
6. "medical marijuana"[Mesh]
7. "Marijuana Smoking"[Mesh]
8. "marijuana abuse"[Mesh]
9. "marihuana abuse"[tw]
10. "cannabinoids"[Mesh]
11. "bhang"[tiab]
12. "bhang"[tw]
13. "hemp"[tiab]
14. "hemp"[tw]
15. "hashish"[tiab]
16. "hashish"[tw]
17. "hash oil"[All Fields]
18. "hash-oil"[All Fields]
19. "hashish oil"[tw]
20. "Indian hemp"[tiab]
21. "indian hemp"[tw]
22. "cannabis sativa"[All Fields]
23. "cannabis indica"[All Fields]
24. "Delta-9-tetrahydrocannabinol"[tiab]
25. "Delta-9-tetrahydrocannabinol"[tw]
26. "Endocannabinoids"[Mesh]
27. "endocannabinoids"[tw])
28. or/1-27
29. ("Infant, Newborn"[Mesh]
30. "low birth weight"[tw]
31. "low birthweight"[tw]
32. "small for gestational age"[tw]
33. "infant"[tw]
34. "fetal"[tw]
35. "fetus"[tw]
36. "neonate"[All Fields]
37. "Embryonic and Fetal Development"[Mesh]
38. "embryology"[Mesh]
39. "infant mortality"[Mesh]
40. "maternal mortality"[Mesh]
41. "prenatal injuries"[Mesh]
42. "Child Development"[Mesh]
43. "Pregnancy"[Mesh]
44. "Pregnancy"[tw]
45. "Female Urogenital Diseases and Pregnancy Complications"[Mesh]
46. "Breast Feeding"[Mesh]
47. "Maternal-Child Nursing"[Mesh]
48. "Postpartum Period"[Mesh])
49. or/29-48
50. "humans"[MeSH Terms]
51. 28 AND 49 AND 50
