# Supplementary material for: Prenatal exposure to cannabis and maternal and child health outcomes: a systematic review and meta-analysis
Source: PubMed Central journal article supplement — BMJ Open. 2016 Apr 1;6(4):e009986. doi: 10.1136/bmjopen-2015-009986 (PMC4823436; doi:10.1136/bmjopen-2015-009986), 2016-04-01
Supplement: bmjopen-2015-009986supp3.pdf [file bmjopen-2015-009986supp3.pdf]

| Author, Year      | Type of study         | Location of Study                                                         | Recruitment Period        | Participants                                                                                                                | Cannabis Analysis                                                                                            | Sample Size <sup>a</sup> | Outcome                                                           | Study Findings                         | Confounding                                                                                                                                            |
|-------------------|-----------------------|---------------------------------------------------------------------------|---------------------------|-----------------------------------------------------------------------------------------------------------------------------|--------------------------------------------------------------------------------------------------------------|--------------------------|-------------------------------------------------------------------|----------------------------------------|--------------------------------------------------------------------------------------------------------------------------------------------------------|
| Ammenheuser, 1998 | Retro-spective cohort | University of Texas Medical Branch (UTMB) in Galveston, TX, USA           | Unknown                   | The mean age for users was 24.8 and non-users was 25.1. Ethnicities included 35% Black, 62% White, and 3% Asian.            | Urine screening with EMIT II (Syva) immuno-assay                                                             | 34 (17 users)            | Fetal mutant lymphocytes per million evaluable cells <sup>b</sup> | 2.55(0.6) users; 0.85(0.23) non-users  | Tobacco users were excluded using cotinine (nicotine metabolite) analysis in blood. All subjects denied regular use of alcohol.                        |
| Barros, 2006      | Cross-sectional       | Mário de Moraes Altenerfeld Silva Maternity Hospital in São Paulo, Brazil | July 2001 - November 2002 | Adolescent mothers 10-20yrs old, mean age with standard deviation was 16.5(1.5) for users and 16.9(1.5) for non-users. Eth- | Maternal hair and neonatal meconium were analyzed for cannabis. Interviews with mothers were also performed. | 561 (26 users)           | Habituation, NNNS                                                 | 6.91(1.11) users; 6.89(1.50) non-users | Excluded infants exposed to other drugs including alcohol and tobacco. Individuals performing the NNNS examinations were blinded with regard to infant |
|                   |                       |                                                                           |                           |                                                                                                                             |                                                                                                              |                          | Attention, NNNS                                                   | 5.30(1.19) users; 5.69(1.31) non-users |                                                                                                                                                        |
|                   |                       |                                                                           |                           |                                                                                                                             |                                                                                                              |                          | Premature onset of labor                                          | 0% users; 3.6% non-users               |                                                                                                                                                        |
|                   |                       |                                                                           |                           |                                                                                                                             |                                                                                                              |                          | 1-minute Apgar                                                    | 8.5(1.30) users; 8.1(1.30) non-users   |                                                                                                                                                        |
|                   |                       |                                                                           |                           |                                                                                                                             |                                                                                                              |                          | 5-minute Apgar                                                    | 9.7(0.60) users; 9.6(0.60) non-users   |                                                                                                                                                        |
|                   |                       |                                                                           |                           |                                                                                                                             |                                                                                                              |                          | Arousal, NNNS                                                     | 4.05(0.60) users;                      |                                                                                                                                                        |

| Author, Year | Type of study | Location of Study | Recruitment Period | Participants                                           | Cannabis Analysis | Sample Size <sup>a</sup> | Outcome                           | Study Findings                            | Confounding    |
|--------------|---------------|-------------------|--------------------|--------------------------------------------------------|-------------------|--------------------------|-----------------------------------|-------------------------------------------|----------------|
|              |               |                   |                    | nicity of the sample included 49% White and 51% Other. |                   |                          |                                   | 3.68(0.70) non-users                      | drug exposure. |
|              |               |                   |                    |                                                        |                   |                          | Asymmetry, NNNS                   | 0.85(0.83) users;<br>0.72(0.93) non-users |                |
|              |               |                   |                    |                                                        |                   |                          | Birth weight (g)                  | 3095(405) users;<br>3120(409) non-users   |                |
|              |               |                   |                    |                                                        |                   |                          | Maternal diabetes                 | 0% users; 3.6% non-users                  |                |
|              |               |                   |                    |                                                        |                   |                          | Excitability, NNNS <sup>b,c</sup> | 3.27(1.40) users;<br>2.40(1.57) non-users |                |
|              |               |                   |                    |                                                        |                   |                          | Gestational age (wks)             | 39.1 (1.1) users;<br>39.3(1.1) non-users  |                |
|              |               |                   |                    |                                                        |                   |                          | Handling, NNNS                    | 0.44(0.28) users;<br>0.36(0.26) non-users |                |
|              |               |                   |                    |                                                        |                   |                          | Head circumference (cm)           | 34.1(1.3) users;<br>34.1(1.3) non-users   |                |
|              |               |                   |                    |                                                        |                   |                          | Hypertonicity, NNNS               | 0.08(0.27) users;<br>0.17(0.38) non-users |                |
|              |               |                   |                    |                                                        |                   |                          | Hypoglycemia                      | 0.0% users; 0.7% non-users                |                |
|              |               |                   |                    |                                                        |                   |                          | Hypotonicity, NNNS                | 0.04(0.20) users;<br>0.13(0.37) non-      |                |

| Author, Year | Type of study | Location of Study | Recruitment Period | Participants | Cannabis Analysis | Sample Size <sup>a</sup> | Outcome                         | Study Findings                         | Confounding |
|--------------|---------------|-------------------|--------------------|--------------|-------------------|--------------------------|---------------------------------|----------------------------------------|-------------|
|              |               |                   |                    |              |                   |                          |                                 | users                                  |             |
|              |               |                   |                    |              |                   |                          | Maternal hypertension           | 14% users; 18% non-users               |             |
|              |               |                   |                    |              |                   |                          | Jaundice                        | 36% users; 28% non-users               |             |
|              |               |                   |                    |              |                   |                          | Length (cm)                     | 48.1(1.9) users; 48.4(1.9) non-users   |             |
|              |               |                   |                    |              |                   |                          | Lethargy, NNNS                  | 4.04(1.97) users; 4.19(1.95) non-users |             |
|              |               |                   |                    |              |                   |                          | Neonate days in hospital        | 2.4(0.9) users; 2.5(0.9) non-users     |             |
|              |               |                   |                    |              |                   |                          | Nonoptimal reflexes, NNNS       | 3.46(1.24) users; 3.71(1.36) non-users |             |
|              |               |                   |                    |              |                   |                          | Prenatal care                   | 26(100) users; 515(96) non-users       |             |
|              |               |                   |                    |              |                   |                          | Quality of movement, NNNS       | 5.10(0.64) users; 5.22(0.45) non-users |             |
|              |               |                   |                    |              |                   |                          | Regulation, NNNS <sup>b</sup>   | 5.75(0.62) users; 6.04(0.72) non-users |             |
|              |               |                   |                    |              |                   |                          | Stress/abstinence signals, NNNS | 0.08(0.06) users; 0.07(0.05) non-users |             |

| Author, Year   | Type of study         | Location of Study                                            | Recruitment Period               | Participants                                                                                                                                 | Cannabis Analysis                                                                                       | Sample Size <sup>a</sup> | Outcome                                                                                                                                                                                               | Study Findings                                                                                                                                                                                                                      | Confounding                                                                                                       |
|----------------|-----------------------|--------------------------------------------------------------|----------------------------------|----------------------------------------------------------------------------------------------------------------------------------------------|---------------------------------------------------------------------------------------------------------|--------------------------|-------------------------------------------------------------------------------------------------------------------------------------------------------------------------------------------------------|-------------------------------------------------------------------------------------------------------------------------------------------------------------------------------------------------------------------------------------|-------------------------------------------------------------------------------------------------------------------|
|                |                       |                                                              |                                  |                                                                                                                                              |                                                                                                         |                          | Transient tachypnea                                                                                                                                                                                   | 21% users; 22% non-users                                                                                                                                                                                                            |                                                                                                                   |
| Berenson, 1996 | Retro-spective cohort | The University of Texas Medical Branch at Galveston, TX, USA | June 1, 1989 - February 28, 1990 | Maternal ages 14-35yrs old, sample consisted of 49% White, 35% Black, and 16% Hispanic. All participants were recruited via medical records. | Urine screening during first prenatal visit, or during delivery if they had not been previously tested. | 183 (36 users)           | 1-minute Apgar<br>5-minute Apgar<br>Fetal distress<br>Intubation required<br>LBW<br>Maternal anemia<br>NICU/ICU<br>Respiratory distress syndrome<br>Sepsis<br>Small Head Size<br>Transfusion required | AOR: 0.7(0.3-1.6)<br>AOR: 0.9(0.3-2.2)<br>AOR:1.6 (0.6-4.2)<br>AOR: 1.9(0.4-9.8)<br>AOR: 1.2(0.5-2.8)<br>AOR: 0.7(0.1-4.3)<br>AOR: 0.5(0.2-1.4)<br>AOR: 0.6(0.1-6.4)<br>AOR:0.5 (0.1-2.0)<br>AOR: 0.8(0.3-1.8)<br>AOR: 0.6(0.1-6.5) | Adjusted for: maternal race, number of cigarettes smoked per day, and whether mother drank alcohol while pregnant |

| <b>Author, Year</b> | <b>Type of study</b>  | <b>Location of Study</b>                                                      | <b>Recruitment Period</b>           | <b>Participants</b>                                                                                                                      | <b>Cannabis Analysis</b> | <b>Sample Size<sup>a</sup></b> | <b>Outcome</b>                                                                            | <b>Study Findings</b>                                                | <b>Confounding</b>                                                                                                                                                                                                                                                                            |
|---------------------|-----------------------|-------------------------------------------------------------------------------|-------------------------------------|------------------------------------------------------------------------------------------------------------------------------------------|--------------------------|--------------------------------|-------------------------------------------------------------------------------------------|----------------------------------------------------------------------|-----------------------------------------------------------------------------------------------------------------------------------------------------------------------------------------------------------------------------------------------------------------------------------------------|
| Bonello, 2014       | Retro-spective cohort | Mid-wives Data Collection (MDC) from all births in New South Wales, Australia | January 1, 2003 - December 31, 2006 | All mothers were 18-44 yrs. old, admitted to hospital with diagnosis of mental/behavioral disorder for cannabinoid use during pregnancy. | Self-report              | 13443 (330 users)              | LBW (<2500g) <sup>b</sup><br>Preterm birth (<37wks) <sup>b</sup><br>NICU/ICU <sup>b</sup> | AOR: 4.85(3.55-6.62)<br>AOR: 3.61(2.58-5.04)<br>AOR: 2.84(2.19-3.68) | Adjusted for maternal age, pre-existing maternal diabetes, pre-existing maternal hypertension, pregnancy complications (pre-eclampsia, gestational diabetes), maternal smoking status (yes/no), remoteness of living area, Index of Relative Socio-economic Disadvantage, maternal country of |

| <b>Author, Year</b> | <b>Type of study</b> | <b>Location of Study</b> | <b>Recruitment Period</b> | <b>Participants</b> | <b>Cannabis Analysis</b>  | <b>Sample Size<sup>a</sup></b> | <b>Outcome</b>         | <b>Study Findings</b>                                                                          | <b>Confounding</b>                                                                                                                                                    |
|---------------------|----------------------|--------------------------|---------------------------|---------------------|---------------------------|--------------------------------|------------------------|------------------------------------------------------------------------------------------------|-----------------------------------------------------------------------------------------------------------------------------------------------------------------------|
|                     |                      |                          |                           |                     |                           |                                |                        |                                                                                                | birth, delivery method, infant gender and fetal/neonatal death.                                                                                                       |
| Braunstein, 1983    | Cohort               | USA                      | Unknown                   | Unknown             | Serum and urine screening | 26 (13 users)                  | Hormone concentrations | No significant differences in hormone concentrations were found between THC and control groups | Patients were matched within two weeks of gestational age. Women who used other illegal drugs during pregnancy or the three months prior to conception were excluded. |

| <b>Author, Year</b> | <b>Type of study</b>                | <b>Location of Study</b>                                                              | <b>Recruitment Period</b> | <b>Participants</b>                                                                                                                                                               | <b>Cannabis Analysis</b> | <b>Sample Size<sup>a</sup></b> | <b>Outcome</b>                                                                                                              | <b>Study Findings</b>                                                                                                                                    | <b>Confounding</b>                                                                                      |
|---------------------|-------------------------------------|---------------------------------------------------------------------------------------|---------------------------|-----------------------------------------------------------------------------------------------------------------------------------------------------------------------------------|--------------------------|--------------------------------|-----------------------------------------------------------------------------------------------------------------------------|----------------------------------------------------------------------------------------------------------------------------------------------------------|---------------------------------------------------------------------------------------------------------|
| Chasnoff, 1992      | Prospective cohort                  | The National Association for Perinatal Addiction Research and Education (NAPARE), USA | Unknown                   | This sample included 34% White, 55% Black, 10% Hispanic, and 1% Oriental. Article states that the users and non-users had a similar mean age, but no mean age or range was given. | Urine screening          | 126 (45 users)                 | Birth weight (g) <sup>c</sup><br>Head circumference (cm) <sup>c</sup><br>Length (cm) <sup>c</sup><br>Preterm birth (<38wks) | 3081(625) users;<br>3447(727) non-users<br>33.5(1.6) users;<br>34.9(2.1) non-users<br>49.3(3.0) users;<br>50.8(3.2) non-users<br>15% users; 5% non-users | Control group was matched at enrollment on maternal age, race, and socioeconomic class.                 |
| El Marroun, 2009    | Population-based prospective cohort | Generation R study in Rotterdam, Netherlands                                          | April 2002 - January 2006 | The mean age and standard deviation for users was 28.3(5.4) and 30.1(5.1) for non-                                                                                                | Self-report              | 5581 (41 users)                | Birth weight (g) <sup>b</sup><br>Gestational age (wks)<br>Head circumference (cm)                                           | 3122.9(544.5) users;<br>3450.1(544.9) non-users<br>39.5(1.7) users;<br>39.8(1.7) non-users<br>Beta coefficient 2.66(-1.66 to 6.93) p=.22                 | Maternal age, educational level, national origin, alcohol use, parity, and gravidity were assessed with |

| Author, Year     | Type of study                       | Location of Study                            | Recruitment Period        | Participants                                                                             | Cannabis Analysis | Sample Size <sup>a</sup> | Outcome                                                          | Study Findings                                                                                                                                                                                                                                                                                                      | Confounding                                              |
|------------------|-------------------------------------|----------------------------------------------|---------------------------|------------------------------------------------------------------------------------------|-------------------|--------------------------|------------------------------------------------------------------|---------------------------------------------------------------------------------------------------------------------------------------------------------------------------------------------------------------------------------------------------------------------------------------------------------------------|----------------------------------------------------------|
|                  |                                     |                                              |                           | users. Maternal national origins collected but not reported.                             |                   |                          |                                                                  |                                                                                                                                                                                                                                                                                                                     | questionnaires and considered as possible confounders.   |
| El Marroun, 2010 | Population-based prospective cohort | Generation R study in Rotterdam, Netherlands | April 2002 - January 2006 | The mean age and standard deviation for users was 30.2(4.8) and 31.8(3.7) for non-users. | Self-report       | 94 (9 users)             | Birth weight (g) <sup>b</sup><br>Cardiac blood flow <sup>b</sup> | 3158(628) users; 3553(532) non-users<br>For fetuses whose mother continued cannabis use during pregnancy, the inner diameter of their aorta was smaller and their pulmonary peak systolic velocity (PPSV) was lower than fetus of non-using mothers (Inner diameter aorta: Users =0.59(0.1); Non-users =0.66(0.06); | All users smoked tobacco and the majority drank alcohol. |



| Author, Year | Type of study | Location of Study | Recruitment Period | Participants | Cannabis Analysis | Sample Size <sup>a</sup> | Outcome | Study Findings                                                                                                                                                                                                                                                                                                                                                                                                                                         | Confounding |
|--------------|---------------|-------------------|--------------------|--------------|-------------------|--------------------------|---------|--------------------------------------------------------------------------------------------------------------------------------------------------------------------------------------------------------------------------------------------------------------------------------------------------------------------------------------------------------------------------------------------------------------------------------------------------------|-------------|
|              |               |                   |                    |              |                   |                          |         | <p>PPSV: Users =66.8(7.8); Non-users =73.3(9.3)).<sup>b</sup> No difference was seen in aortic diameter or peak systolic velocity of infants whose mother stopped using cannabis during early pregnancy and those where the mother was a non-user (Inner diameter aorta=0.62(0.07); PPSV=72.6(8.2)). No difference in cardiac blood flow was found between the following variables: Fetal heart rate of the aorta or pulmonary arteries, the inner</p> |             |

| Author, Year | Type of study | Location of Study | Recruitment Period | Participants | Cannabis Analysis | Sample Size <sup>a</sup> | Outcome                           | Study Findings                                                                                                                                                                                                                                                                                     | Confounding |
|--------------|---------------|-------------------|--------------------|--------------|-------------------|--------------------------|-----------------------------------|----------------------------------------------------------------------------------------------------------------------------------------------------------------------------------------------------------------------------------------------------------------------------------------------------|-------------|
|              |               |                   |                    |              |                   |                          |                                   | diameter of pulmonary artery, and aortic PSV.                                                                                                                                                                                                                                                      |             |
|              |               |                   |                    |              |                   |                          | Gestational age (wks)             | 39.9(2.4) users; 39.9(1.8) non-users                                                                                                                                                                                                                                                               |             |
|              |               |                   |                    |              |                   |                          | Placental blood flow <sup>b</sup> | Pulsatility index (PI) and resistance index (RI) of mothers who used throughout pregnancy was higher than non-users (PI uterine artery: users =0.58(0.14); non-users =0.50(0.11); RI uterine artery: 1.00(0.44); non-users =0.79(0.30)). For cannabis using mothers that discontinued use in early |             |

| Author, Year | Type of study      | Location of Study                                                          | Recruitment Period | Participants                                            | Cannabis Analysis               | Sample Size <sup>a</sup> | Outcome                                                | Study Findings                                                                                                                                                                                                                                                           | Confounding    |
|--------------|--------------------|----------------------------------------------------------------------------|--------------------|---------------------------------------------------------|---------------------------------|--------------------------|--------------------------------------------------------|--------------------------------------------------------------------------------------------------------------------------------------------------------------------------------------------------------------------------------------------------------------------------|----------------|
|              |                    |                                                                            |                    |                                                         |                                 |                          |                                                        | pregnancy, lower pulsatility and resistance indices were seen compared to non-using mothers (early pregnancy users uterine artery PI: 0.44(0.07); RI: 0.63(0.17)) . No difference was found in any group between placental blood flow in umbilical artery and vein flow. |                |
| Fried, 1984  | Prospective cohort | Department of Psychology, Carleton University, Ottawa Hospitals in Ottawa, | 1979-1983          | The mean age for users was 25.9 and non-users was 29.3. | Self-report and urine screening | 517 (18 users)           | Birth weight (g)<br>Gestational age (wks) <sup>b</sup> | 3396(321) users;<br>3490(523) non-users<br>38.8(1.77) users;<br>39.7(1.67) non-users                                                                                                                                                                                     | Crude numbers. |

| Author, Year | Type of study      | Location of Study                                                                          | Recruitment Period | Participants                                            | Cannabis Analysis | Sample Size <sup>a</sup> | Outcome                                                                                                                                                                               | Study Findings                                                                                                                         | Confounding                                                                                         |
|--------------|--------------------|--------------------------------------------------------------------------------------------|--------------------|---------------------------------------------------------|-------------------|--------------------------|---------------------------------------------------------------------------------------------------------------------------------------------------------------------------------------|----------------------------------------------------------------------------------------------------------------------------------------|-----------------------------------------------------------------------------------------------------|
|              |                    | Ontario, Canada                                                                            |                    |                                                         |                   |                          |                                                                                                                                                                                       |                                                                                                                                        |                                                                                                     |
| Fried, 1987a | Prospective cohort | Department of Psychology, Carleton University, Ottawa Hospitals in Ottawa, Ontario, Canada | 1979-1983          | The mean age for users was 26.9 and non-users was 29.3. | Self-report       | 284 (32 users)           | Prechtl Assessment, Day 9 <sup>b</sup>                                                                                                                                                | More hand-to-mouth, startle, and tremors were significant; all other variables were not.                                               | Crude numbers.                                                                                      |
| Fried, 1987b | Prospective cohort | Department of Psychology, Carleton University, Ottawa Hospitals in Ottawa, Ontario, Canada | 1979-1983          | The mean age for users was 26.9 and non-users was 29.3. | Self-report       | 250 (24 users)           | Habituation to light, NBAS <sup>b</sup><br>Irritability, NBAS <sup>b</sup><br>Response to light, NBAS <sup>b</sup><br>Startles, NBAS <sup>b</sup><br>Tremulousness, NBAS <sup>b</sup> | F=4.67; df=188,3; p=0.032<br>F=3.77; df=226,4; p=0.053<br>F=1.51; df=227,3; p=0.220<br>F=12.89; df=227,3; p=0.000<br>F=3.90; df=228,2; | Gestation length (weeks), caffeine (mg per day), age at testing (days), family income, maternal age |

| Author, Year | Type of study      | Location of Study                                                                          | Recruitment Period | Participants                                                                          | Cannabis Analysis | Sample Size <sup>a</sup> | Outcome                                                                                        | Study Findings                                                                                                                                                                                                                         | Confounding    |
|--------------|--------------------|--------------------------------------------------------------------------------------------|--------------------|---------------------------------------------------------------------------------------|-------------------|--------------------------|------------------------------------------------------------------------------------------------|----------------------------------------------------------------------------------------------------------------------------------------------------------------------------------------------------------------------------------------|----------------|
|              |                    |                                                                                            |                    |                                                                                       |                   |                          |                                                                                                | p=0.050                                                                                                                                                                                                                                |                |
| Fried, 1991  | Prospective cohort | Department of Psychology, Carleton University, Ottawa Hospitals in Ottawa, Ontario, Canada | 1979-1983          | Unknown                                                                               | Self-report       | Unknown                  | Miscarriage<br>Apgar Score<br>Major Complications at Birth<br>Anomaly<br>Presentation at birth | No association<br>No association<br>No association<br>No association                                                                                                                                                                   | Unknown.       |
| Fried, 1999  | Prospective cohort | Department of Psychology, Carleton University, Ottawa Hospitals in Ottawa, Ontario, Canada | 1979-1983          | The mean age for users was 25.9 and non-users was 29.3. Infants were tested at birth. | Self-report       | 679 (115 users)          | Head circumference (cm)<br>Length (cm)                                                         | Infants exposed to cannabis $\geq 6$ times/wk had a decrease in head circumference (z-score: -0.36(1.4) and 0.15(1.3), respectively)<br>Infants exposed to cannabis $\geq 6$ times/wk had a decrease in length (z-score: 0.34(1.8) and | Crude Numbers. |

| Author, Year  | Type of study         | Location of Study                                            | Recruitment Period             | Participants                                                                             | Cannabis Analysis | Sample Size <sup>a</sup> | Outcome                       | Study Findings                                                                                                                | Confounding    |
|---------------|-----------------------|--------------------------------------------------------------|--------------------------------|------------------------------------------------------------------------------------------|-------------------|--------------------------|-------------------------------|-------------------------------------------------------------------------------------------------------------------------------|----------------|
|               |                       |                                                              |                                |                                                                                          |                   |                          |                               | 0.69(1.2), respectively                                                                                                       |                |
|               |                       |                                                              |                                |                                                                                          |                   |                          | Birth weight (g) <sup>b</sup> | Infants exposed to cannabis $\geq 6$ times/wk had a decrease in birth weight (z-score: 0.22(1.2) and 0.70(1.2), respectively) |                |
| Gargari, 2012 | Retro-spective cohort | Shahid Beheshti University of Medical Sciences, Tehran, Iran | April 1, 2004 - March 31, 2009 | The mean age and standard deviation for users was 26.2(4.9) and for non-users 26.5(5.6). | Self-report       | 526 (7 users)            | 5-minute Apgar                | 9.3(1.9) users; 9.8(0.5) non-users                                                                                            | Crude Numbers. |
|               |                       |                                                              |                                |                                                                                          |                   |                          | Anomaly                       | 0% users; 1.5% non-users                                                                                                      |                |
|               |                       |                                                              |                                |                                                                                          |                   |                          | Birth weight (g)              | 2763(829) users; 3001(608) non-users                                                                                          |                |
|               |                       |                                                              |                                |                                                                                          |                   |                          | Gestational age (wks)         | 37.5(3.5) users; 37.9(2.3) non-users                                                                                          |                |
|               |                       |                                                              |                                |                                                                                          |                   |                          | Head circumference (cm)       | 31.2(6.8) users; 34.3(1.9) non-users                                                                                          |                |
|               |                       |                                                              |                                |                                                                                          |                   |                          | Length (cm)                   | 48.2(8.1) users; 49.2(3.0) non-users                                                                                          |                |
|               |                       |                                                              |                                |                                                                                          |                   |                          | Maternal anemia               | 0% users; 5.2% non-users                                                                                                      |                |

| Author, Year    | Type of study      | Location of Study                                                                   | Recruitment Period | Participants                                                                                        | Cannabis Analysis                                         | Sample Size <sup>a</sup> | Outcome                                 | Study Findings                     | Confounding                                                                                                   |
|-----------------|--------------------|-------------------------------------------------------------------------------------|--------------------|-----------------------------------------------------------------------------------------------------|-----------------------------------------------------------|--------------------------|-----------------------------------------|------------------------------------|---------------------------------------------------------------------------------------------------------------|
|                 |                    |                                                                                     |                    |                                                                                                     |                                                           |                          | Neonatal death                          | 5.9% users; 1.9% non-users         |                                                                                                               |
|                 |                    |                                                                                     |                    |                                                                                                     |                                                           |                          | Neonate days in hospital                | 2.9(2.2) users; 2.9(1.8) non-users |                                                                                                               |
|                 |                    |                                                                                     |                    |                                                                                                     |                                                           |                          | NICU/ICU                                | 64.7% users; 31.7% non-users       |                                                                                                               |
|                 |                    |                                                                                     |                    |                                                                                                     |                                                           |                          | Postpartum hemorrhage                   | 0% users; 2.5% non-users           |                                                                                                               |
|                 |                    |                                                                                     |                    |                                                                                                     |                                                           |                          | Prenatal Care                           | 28.6% users; 28.9% non-users       |                                                                                                               |
|                 |                    |                                                                                     |                    |                                                                                                     |                                                           |                          | Preterm birth (<37wks)                  | 18.2% users; 22.3% non-users       |                                                                                                               |
|                 |                    |                                                                                     |                    |                                                                                                     |                                                           |                          | Rupture of the membranes prior to labor | 41.2% users; 28.9% non-users       |                                                                                                               |
|                 |                    |                                                                                     |                    |                                                                                                     |                                                           |                          | Small for gestational age               | 9.1% users; 12.1% non-users        |                                                                                                               |
| Greenland, 1982 | Prospective cohort | Prenatal clinics of the University of California, Los Angeles (UCLA) Center for the | Unknown            | Maternal mean age is 23.7 users, 24.2 non-users, age range 18-35, with 61% White, 31% Black, and 8% | Self-report with serum and urine screening for validation | 71 (35 users)            | Resuscitation                           | 41% users; 22% non-users           | Matching based on the following characteristics: age, gravidity, ethnicity and center of care. The authors do |
|                 |                    |                                                                                     |                    |                                                                                                     |                                                           |                          | 5-minute Apgar (≤6)                     | 0% users; 6% non-users             |                                                                                                               |
|                 |                    |                                                                                     |                    |                                                                                                     |                                                           |                          | Abnormal Fetal Tests                    | 11% users; 0% non-users            |                                                                                                               |
|                 |                    |                                                                                     |                    |                                                                                                     |                                                           |                          | Gestational age (<34wks)                | 3% users; 0% non-users             |                                                                                                               |
|                 |                    |                                                                                     |                    |                                                                                                     |                                                           |                          | Hyperemesis gravidarum                  | 17% users; 11% non-users           |                                                                                                               |
|                 |                    |                                                                                     |                    |                                                                                                     |                                                           |                          | Late anemia (af-                        | 11% users; 12%                     |                                                                                                               |

| Author, Year    | Type of study      | Location of Study                                                                            | Recruitment Period | Participants                                                             | Cannabis Analysis | Sample Size <sup>a</sup>               | Outcome                                                                       | Study Findings                                                                                           | Confounding                                                                               |
|-----------------|--------------------|----------------------------------------------------------------------------------------------|--------------------|--------------------------------------------------------------------------|-------------------|----------------------------------------|-------------------------------------------------------------------------------|----------------------------------------------------------------------------------------------------------|-------------------------------------------------------------------------------------------|
|                 |                    | Health Sciences, the Kaiser-Permanente Medical Care Program, San Fernando Valley Center, USA |                    | Hispanic.                                                                |                   |                                        | ter 34wks)<br>LBW (<2500g)                                                    | non-users<br>9% user, 6% non-users                                                                       | state that matching on ethnicity was sometimes relaxed. Alcohol and tobacco were allowed. |
|                 |                    |                                                                                              |                    |                                                                          |                   | Manual removal of the placenta         | 17% users; 8% non-users                                                       |                                                                                                          |                                                                                           |
|                 |                    |                                                                                              |                    |                                                                          |                   | Maternal anemia (<11g/dL)              | 12% users; 8% non-users                                                       |                                                                                                          |                                                                                           |
|                 |                    |                                                                                              |                    |                                                                          |                   | Maternal bleeding (after 20wks)        | 3% users; 3% non-users                                                        |                                                                                                          |                                                                                           |
|                 |                    |                                                                                              |                    |                                                                          |                   | Poor maternal weight gain (≤15lbs)     | 12% users; 3% non-users                                                       |                                                                                                          |                                                                                           |
|                 |                    |                                                                                              |                    |                                                                          |                   | Precipitate labor (≤3hrs) <sup>b</sup> | 29% users; 3% non-users                                                       |                                                                                                          |                                                                                           |
|                 |                    |                                                                                              |                    |                                                                          |                   | Prolonged /protracted/ arrested labor  | 31% users; 19% non-users                                                      |                                                                                                          |                                                                                           |
|                 |                    |                                                                                              |                    |                                                                          |                   | Respiratory distress syndrome          | 14% users; 11% non-users                                                      |                                                                                                          |                                                                                           |
|                 |                    |                                                                                              |                    |                                                                          |                   | Suspected IUGR                         | 11% users; 8% non-users                                                       |                                                                                                          |                                                                                           |
| Greenland, 1983 | Prospective cohort | Enrolled for home delivery at Los Angeles Child-birth                                        | Unknown            | Mean age for users was 26.2 for users and 26.7 for non-users. The sample | Self-report       | 313 (41 users)                         | Elevated blood pressure<br>Hyperemesis gravidarum<br>Jaundice<br>Labor ≥20hrs | 0% users; 4% non-users<br>2% users; 3% non-users<br>15% users; 155 non-users<br>13% users; 11% non-users |                                                                                           |



| Author, Year      | Type of study      | Location of Study                          | Recruitment Period | Participants                                                                                                                                                 | Cannabis Analysis | Sample Size <sup>a</sup> | Outcome                                     | Study Findings                       | Confounding                                                |
|-------------------|--------------------|--------------------------------------------|--------------------|--------------------------------------------------------------------------------------------------------------------------------------------------------------|-------------------|--------------------------|---------------------------------------------|--------------------------------------|------------------------------------------------------------|
|                   |                    | Center (LACC) in West Los Angeles, CA, USA |                    | was primarily White (95%), all other women were classified as Hispanic or Black (4% and 1%, respectively). Women were recruited from a home-birthing center. |                   |                          | LBW (<2500g)                                | 5% user, 2% non-users                |                                                            |
|                   |                    |                                            |                    |                                                                                                                                                              |                   |                          | Manual removal of the placenta <sup>b</sup> | 10% users; 3% non-users              |                                                            |
|                   |                    |                                            |                    |                                                                                                                                                              |                   |                          | Maternal anemia (<11g/dL)                   | 12% users; 17% non-users             |                                                            |
|                   |                    |                                            |                    |                                                                                                                                                              |                   |                          | Maternal bleeding (after 20wks)             | 0% users; 2% non-users               |                                                            |
|                   |                    |                                            |                    |                                                                                                                                                              |                   |                          | Postpartum hemorrhage (≥500ml)              | 7% users; 7% non-users               |                                                            |
|                   |                    |                                            |                    |                                                                                                                                                              |                   |                          | Precipitate labor                           | 13% users; 8% non-users              |                                                            |
|                   |                    |                                            |                    |                                                                                                                                                              |                   |                          | Primary dysfunctional labor                 | 43% users; 35% non-users             |                                                            |
|                   |                    |                                            |                    |                                                                                                                                                              |                   |                          | Prolonged latent phase of labor             | 13% users; 17% non-users             |                                                            |
|                   |                    |                                            |                    |                                                                                                                                                              |                   |                          | Resuscitation                               | 17% users; 16% non-users             |                                                            |
|                   |                    |                                            |                    |                                                                                                                                                              |                   |                          | Ruptures of the membranes prior to labor    | 23% users; 19% non-users             |                                                            |
|                   |                    |                                            |                    |                                                                                                                                                              |                   |                          | Secondary arrest of labor                   | 5% users; 6% non-users               |                                                            |
| Hayatbakhsh, 2011 | Prospective cohort | Mater Mothers' Hospital, Brisbane,         | 2000-2006          | The mean age and standard deviation of the                                                                                                                   | Self-report       | 24874 (637 users)        | Length (cm)                                 | 48.0(9.1) users; 49.3(9.7) non-users | Adjusted for mother's age, parity, ethnicity, weight, cig- |
|                   |                    |                                            |                    |                                                                                                                                                              |                   |                          | LBW (<2500g)                                | AOR: 1.7(1.3-2.2)                    |                                                            |

| Author, Year | Type of study      | Location of Study                                    | Recruitment Period                           | Participants                                                                                                | Cannabis Analysis | Sample Size <sup>a</sup> | Outcome                                                                                                                                                     | Study Findings                                                                                                                                                                                                                                                   | Confounding                                                                             |
|--------------|--------------------|------------------------------------------------------|----------------------------------------------|-------------------------------------------------------------------------------------------------------------|-------------------|--------------------------|-------------------------------------------------------------------------------------------------------------------------------------------------------------|------------------------------------------------------------------------------------------------------------------------------------------------------------------------------------------------------------------------------------------------------------------|-----------------------------------------------------------------------------------------|
|              |                    | Australia                                            |                                              | sample was 28.4 (5.8). Their sample comprised of 75% White, 4% Indigenous, 12% Asian and 9% Other.          |                   |                          | NICU/ICU<br>Preterm birth (<37wks)<br>Small for gestational age                                                                                             | AOR: 2(1.7-2.4)<br>AOR: 1.5(1.1-1.9)<br>AOR: 2.2(1.8-2.7)                                                                                                                                                                                                        | arett<br>smoking, alcohol consumption, and use of other illicit drugs during pregnancy. |
| Hayes, 1991  | Prospective cohort | Designated communities of St. Thomas parish, Jamaica | Infants born between October 1983 - May 1985 | The mean age and standard deviation for users was 22.9(5.7) and 22.6(7.13) for non-users, ranging 16-38yrs. | Self-report       | 56 (30 users)            | Autonomic Stability, NBAS, Day 1<br>Birth weight (g)<br>Gestational age (wks)<br>Habituation, NBAS, Day 1<br>Motor, NBAS, Day 1<br>Orientation, NBAS, Day 1 | 3.56(1.2) users;<br>3.06(1.0) non-users<br>3060(0.42) users;<br>3130(0.45) non-users<br>40.0(2.3) users;<br>39.2(2.6) non-users<br>6.50(1.0) users;<br>6.66(1.3) non-users<br>4.85(0.9) users;<br>4.90(0.6) non-users<br>4.68(1.6) users;<br>5.10(1.0) non-users | Study not confounded by poly-drug, alcohol, tobacco, or LBW for NBAS.                   |

| Author, Year | Type of study | Location of Study                                       | Recruitment Period     | Participants                                                                                                                                            | Cannabis Analysis | Sample Size <sup>a</sup> | Outcome                                 | Study Findings                                                                               | Confounding                                                 |
|--------------|---------------|---------------------------------------------------------|------------------------|---------------------------------------------------------------------------------------------------------------------------------------------------------|-------------------|--------------------------|-----------------------------------------|----------------------------------------------------------------------------------------------|-------------------------------------------------------------|
|              |               |                                                         |                        |                                                                                                                                                         |                   |                          | Preterm birth                           | 0% users; 3.3% non-users                                                                     |                                                             |
|              |               |                                                         |                        |                                                                                                                                                         |                   |                          | Range of State, NBAS, Day 1             | 3.08(0.6) users; 3.99(0.5) non-users                                                         |                                                             |
|              |               |                                                         |                        |                                                                                                                                                         |                   |                          | Reflexes, NBAS, Day 1                   | 12.17(3.1) users; 13.38(2.2) non-users                                                       |                                                             |
|              |               |                                                         |                        |                                                                                                                                                         |                   |                          | Regulation of State, NBAS, Day 1        | 5.17(0.8) users; 5.22(0.8) non-users                                                         |                                                             |
| Kline, 1991  | Case-control  | Three New York City Hospitals in New York City, NY, USA | August 1979 - May 1986 | The mean age and standard deviation for combined spontaneous abortion group was 26.5(6.6) and 26.5(6.2) for controls. Ethnicities of the group included | Self-report       | 3002 (960 users)         | Spontaneous abortion of known karyotype | No association                                                                               | Adjusted for maternal age, ethnicity and cigarette smoking. |
|              |               |                                                         |                        |                                                                                                                                                         |                   |                          | Chromosomally aberrant combined         | Karotype groups vs controls AOR: 1.2(0.7-1.9) Chromosomally aberrant vs normal: 1.1(0.6-1.9) |                                                             |
|              |               |                                                         |                        |                                                                                                                                                         |                   |                          | Chromosomally normal                    | Karotype groups vs controls AOR: 1.1(0.7-1.5)                                                |                                                             |

| Author, Year | Type of study | Location of Study                  | Recruitment Period           | Participants                                                                                                                                                                           | Cannabis Analysis      | Sample Size <sup>a</sup> | Outcome                                                                              | Study Findings                                                                                                                                                                                     | Confounding                                                            |
|--------------|---------------|------------------------------------|------------------------------|----------------------------------------------------------------------------------------------------------------------------------------------------------------------------------------|------------------------|--------------------------|--------------------------------------------------------------------------------------|----------------------------------------------------------------------------------------------------------------------------------------------------------------------------------------------------|------------------------------------------------------------------------|
|              |               |                                    |                              | 23% USA-born Black, 41% Dominican, 17% other Hispanic, and 19% Other.                                                                                                                  |                        |                          |                                                                                      |                                                                                                                                                                                                    |                                                                        |
| Lozano, 2007 | Cohort        | Hospital del Mar, Barcelona, Spain | October 2002 - February 2004 | Maternal age with standard deviation is 28.9(6.4) users and 29.3(6.2) non-users. The sample included 50% Spanish, 6% European (non-Spanish), 23% American, 11% African, and 10% Asian. | Meconium drug analysis | 928 (52 users)           | Birth weight (g)<br>Head circumference (cm)<br>Length (cm)<br>Preterm birth (<37wks) | 3281.7(3108.9-3454.4) users;<br>3212.4(3174.1-3250.8) non-users<br>34.3(33.8-34.8) users; 34.1(33.9-34.2) non-users<br>48.9(48.3-49.6) users; 48.8(48.6-49.0) non-users<br>0% user, 7.6% non-users | Adjusted for cigarette smoking, sex, maternal age and gestation weeks. |

| <b>Author, Year</b> | <b>Type of study</b> | <b>Location of Study</b>                                                                      | <b>Recruitment Period</b>      | <b>Participants</b>                                                                                                                          | <b>Cannabis Analysis</b>                                                                 | <b>Sample Size<sup>a</sup></b> | <b>Outcome</b>                                                                                                                                                        | <b>Study Findings</b>                                                                                                                                                                                                 | <b>Confounding</b>                                                                                                                                     |
|---------------------|----------------------|-----------------------------------------------------------------------------------------------|--------------------------------|----------------------------------------------------------------------------------------------------------------------------------------------|------------------------------------------------------------------------------------------|--------------------------------|-----------------------------------------------------------------------------------------------------------------------------------------------------------------------|-----------------------------------------------------------------------------------------------------------------------------------------------------------------------------------------------------------------------|--------------------------------------------------------------------------------------------------------------------------------------------------------|
| Ostrea, 1997        | Prospective cohort   | Hutzel Hospital, Children's Hospital of Michigan and Wayne State University, Detroit, MI, USA | November 1988 - September 1989 | Sample comprised of 83% Black and 17% Other.                                                                                                 | Anonymous meconium drug analysis of every other baby born, analyzed for cannabinoid only | 1815 (157 users)               | 1-minute Apgar ( $\leq 6$ )<br>2-minute Apgar ( $\leq 6$ )<br>Head circumference (<34cm)<br>LBW (<2500g)<br>Length (<45cm)<br>Prenatal care<br>Preterm birth (<37wks) | 8.3% users; 8.7% non-users<br>0.6% users; 1.0% non-users<br>62.3% users; 57.1% non-users<br>15.9% users; 13.6% non-users<br>9.6% users; 11.9% non-users<br>8.3% users; 6.0% non-users<br>15.9% users; 18.3% non-users | Crude numbers.                                                                                                                                         |
| Quinlivan, 2002     | Prospective cohort   | Multi-center: 3 metro Australian hospitals                                                    | July 1998 - June 2000          | Median age and interquartile range was 16.4 (16-17) for users and 16.3 (16-17) for non-users. The age range was 12-17yrs old, with 69% White | Self-report                                                                              | 425 (62 users)                 | 1-minute Apgar<br>5-minute Apgar<br>Antenatal problems<br>Antepartum hemorrhage<br>Birth weight (g)<br>Gestational age (wks)                                          | 7.6(7-9) users; 7.6(7-9) non-users<br>9(8-9) users; 9(8-9) non-users<br>18% users; 30% non-users<br>13% users; 10% non-users<br>3068(96) users; 3113(37) non-users<br>37.9(0.4) users; 38.2(0.2) non-users            | Model was adjusted for: maternal height, pre-pregnancy weight, age and race, newborn gestational age and gender, and significant predictors of illegal |

| Author, Year    | Type of study | Location of Study                | Recruitment Period  | Participants                        | Cannabis Analysis | Sample Size <sup>a</sup> | Outcome                                 | Study Findings                       | Confounding                               |
|-----------------|---------------|----------------------------------|---------------------|-------------------------------------|-------------------|--------------------------|-----------------------------------------|--------------------------------------|-------------------------------------------|
|                 |               |                                  |                     | and 31% classified as Aboriginal.   |                   |                          | Gestational hypertension                | 10% users; 17% non-users             | drug use such as smoking and alcohol use. |
|                 |               |                                  |                     |                                     |                   |                          | Head circumference (cm)                 | 33.3(0.3) users; 33.7(0.1) non-users |                                           |
|                 |               |                                  |                     |                                     |                   |                          | Length (cm)                             | 48.6(0.5) users; 48.3(0.2) non-users |                                           |
|                 |               |                                  |                     |                                     |                   |                          | Maternal anemia                         | 52% users; 53% non-users             |                                           |
|                 |               |                                  |                     |                                     |                   |                          | Maternal days in hospital               | 3.5(0.2) users; 3.8(0.1) non-users   |                                           |
|                 |               |                                  |                     |                                     |                   |                          | Maternal post-natal problem             | 55% users; 51% non-users             |                                           |
|                 |               |                                  |                     |                                     |                   |                          | Neonate days in hospital                | 6.5(1.4) users; 6.4(0.5) non-users   |                                           |
|                 |               |                                  |                     |                                     |                   |                          | Postnatal problems                      | 53% users; 53% non-users             |                                           |
|                 |               |                                  |                     |                                     |                   |                          | Preterm birth (<37wks)                  | 18% users; 16% non-users             |                                           |
|                 |               |                                  |                     |                                     |                   |                          | Rupture of the membranes prior to labor | 5% users; 9% non-users               |                                           |
| Shankaran, 2004 | Cohort        | Four National Institute of Child | May 1993 - May 1995 | The mean age and standard deviation | Self-report       | 144 (3 users)            | Birth weight (g)                        | 2949(454) users; 3266(468) non-users | Crude numbers.                            |
|                 |               |                                  |                     |                                     |                   |                          | Head circumfer-                         | 34(0.9) users;                       |                                           |

| Author, Year | Type of study | Location of Study                                                                                                                                                                                          | Recruitment Period | Participants                                                | Cannabis Analysis | Sample Size <sup>a</sup> | Outcome                  | Study Findings                                               | Confounding |
|--------------|---------------|------------------------------------------------------------------------------------------------------------------------------------------------------------------------------------------------------------|--------------------|-------------------------------------------------------------|-------------------|--------------------------|--------------------------|--------------------------------------------------------------|-------------|
|              |               | Health and Human Development Neonatal Research Network Centers: Brown University (Providence, RI), University of Miami (Miami, FL), University of Tennessee (Memphis, TN), and Wayne State University (De- |                    | was 25.7(5.7), and included 76% Black, 15% White, 9% Other. |                   |                          | ence (cm)<br>Length (cm) | 34(1.4) non-users<br>51.2(4.2) users;<br>50.3(2.5) non-users |             |

| Author, Year | Type of study         | Location of Study                              | Recruitment Period | Participants                                     | Cannabis Analysis | Sample Size <sup>a</sup> | Outcome                                                                                                                                                                                                         | Study Findings                                                                                                                                                                                                                                                                                                                               | Confounding    |
|--------------|-----------------------|------------------------------------------------|--------------------|--------------------------------------------------|-------------------|--------------------------|-----------------------------------------------------------------------------------------------------------------------------------------------------------------------------------------------------------------|----------------------------------------------------------------------------------------------------------------------------------------------------------------------------------------------------------------------------------------------------------------------------------------------------------------------------------------------|----------------|
|              |                       | troit, MI), USA                                |                    |                                                  |                   |                          |                                                                                                                                                                                                                 |                                                                                                                                                                                                                                                                                                                                              |                |
| Witter, 1990 | Retro-spective cohort | The Johns Hopkins Hospital, Baltimore, MD, USA | 1983-1985          | The sample included 32% White and 68% non-White. | Self-report       | 8350 (417 users)         | Abruptio Anomaly<br>Birth weight (g)<br>Duration of labor (min)<br>Fetal distress<br>LBW (<2500g)<br>Maternal anemia<br>Maternal weight gain (lbs.)<br>Perinatal mortality (per 1000)<br>Preterm birth (<37wks) | 1.2% users; 0.9% non-users<br>5.52% users; 4.59% non-users<br>2991(687) users; 3110(755) non-users<br>594(392) users; 611(457) non-users<br>6.5% users; 5.5% non-users<br>17.8% user, 15.9% non-users<br>21.3% user, 14.9% non-users<br>29.4(14.5) users; 31.2(14.8) non-users<br>24.0 users; 19.8 non-users<br>19.4% users; 17.1% non-users | Crude numbers. |

Notes:

<sup>a</sup> significance was calculated using number of subjects for each outcome, which may have differed from total sample size

<sup>b</sup> this outcome was reported as significant by the authors in the original paper

<sup>c</sup> this outcome was significant when calculated from the crude numbers listed in the original paper
