# Supplementary material for: Prenatal exposure to cannabis and maternal and child health outcomes: a systematic review and meta-analysis
Source: PubMed Central journal article supplement — BMJ Open. 2016 Apr 1;6(4):e009986. doi: 10.1136/bmjopen-2015-009986 (PMC4823436; doi:10.1136/bmjopen-2015-009986), 2016-04-01

**Supplement 4: Forest Plot 1: Odds of Maternal Anemia among Cannabis Users**

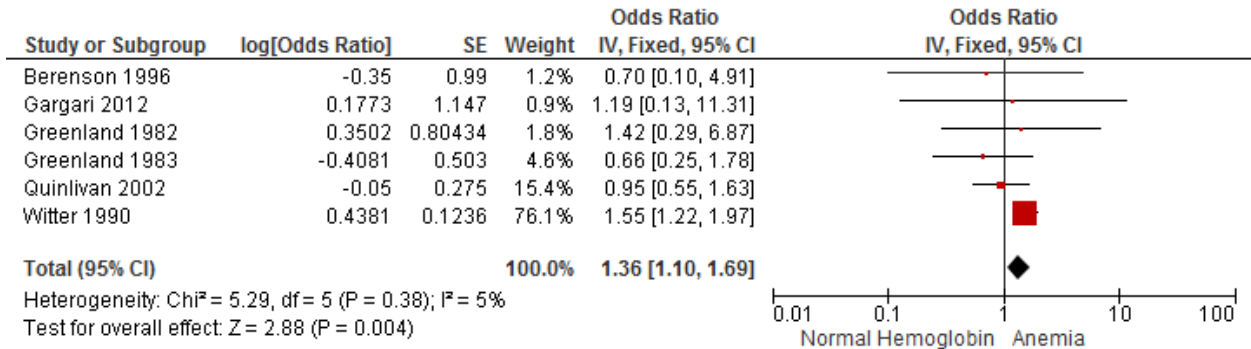

**Supplement 3: Forest Plot 2: Mean Difference in Birth Weight of Infants Exposed to Cannabis in-utero**

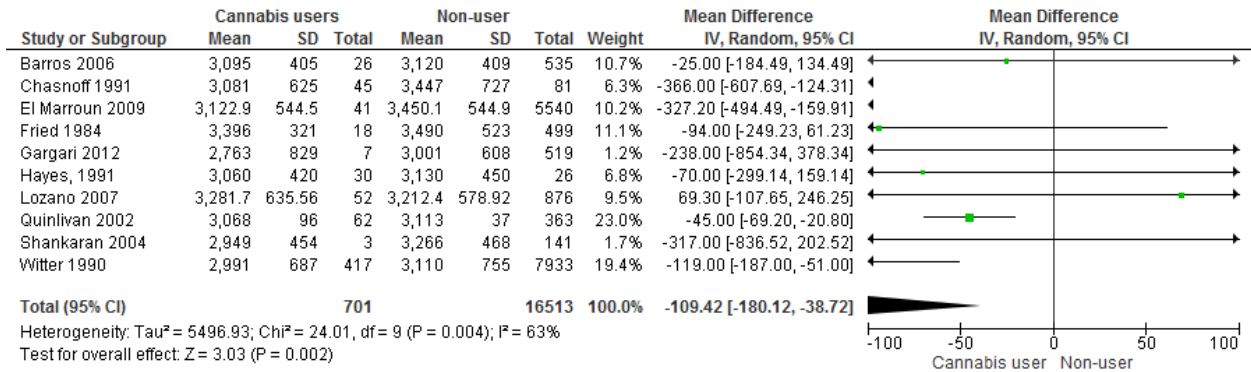

**Supplement 3: Forest Plot 3: Odds of Low Birth Weight among Infants Exposed to Cannabis**

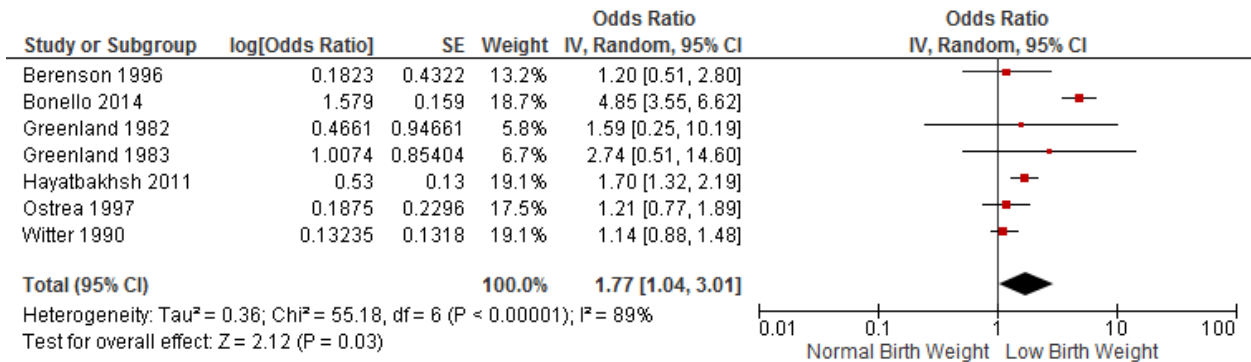

### Supplement 3: Forest Plot 4: Mean Difference in Gestational Age among Infants Exposed to Cannabis in-utero

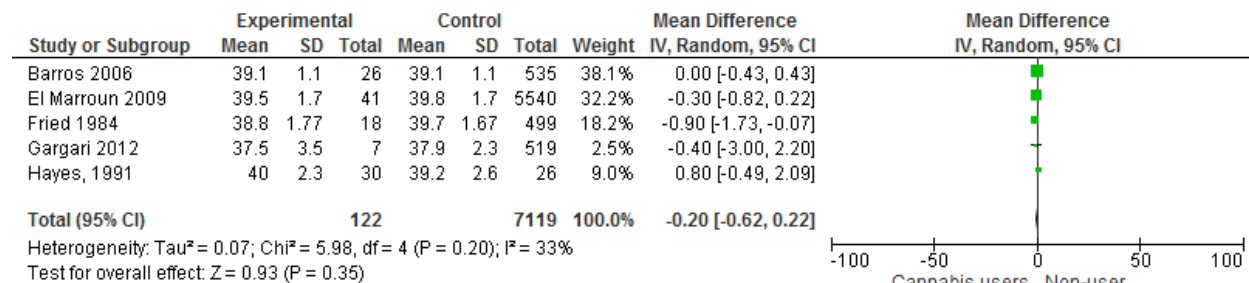

### Supplement 3: Forest Plot 5: Mean difference in Neonatal Length among Infants Exposed to Cannabis in-utero

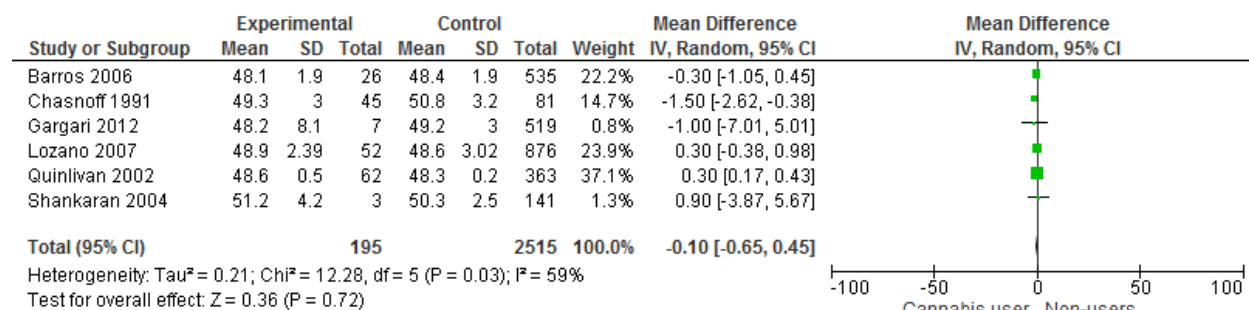

### Supplement 3: Forest Plot 6: Mean Difference in Head Circumference among Infants Exposed to Cannabis in-utero

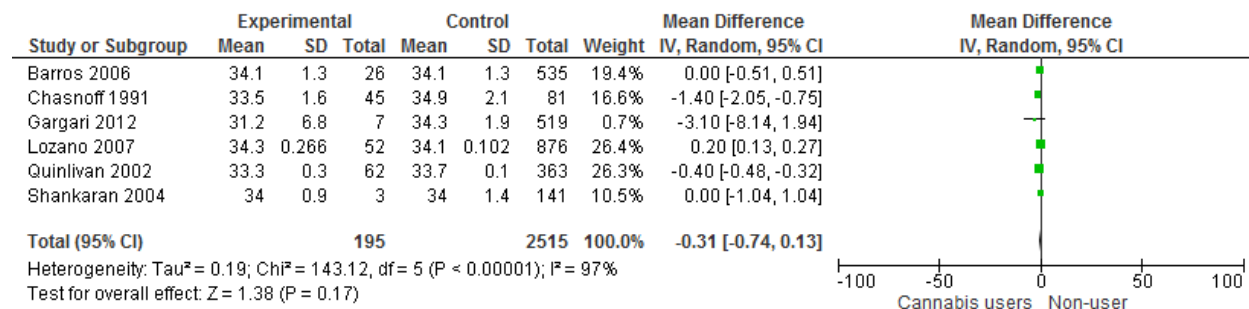

**Supplement 3: Forest Plot 7: Odds of Preterm Birth Among Infants Exposed to Cannabis in-utero**

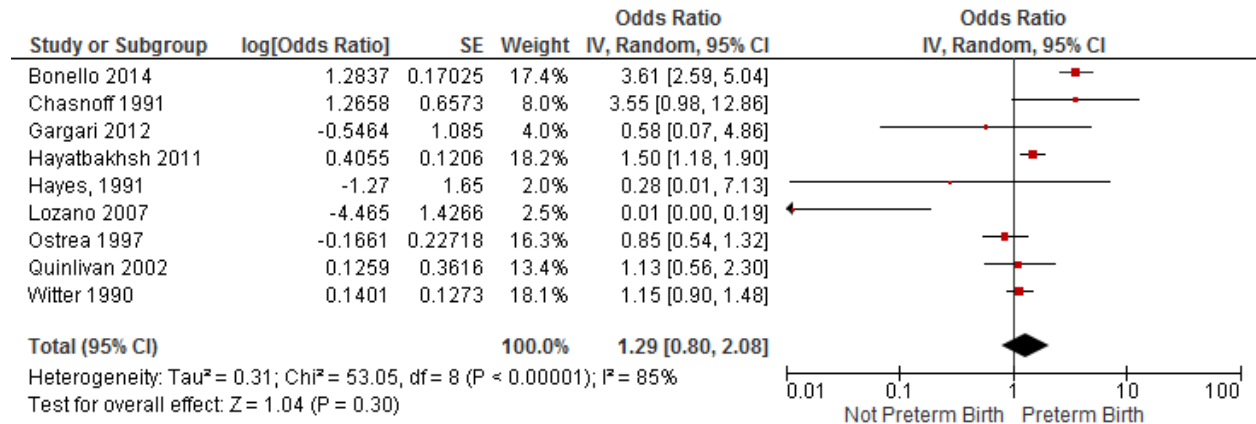

**Supplement 3: Forest Plot 8: Odds of Admission to NICU/ICU among Infants Exposed to Cannabis in-utero**

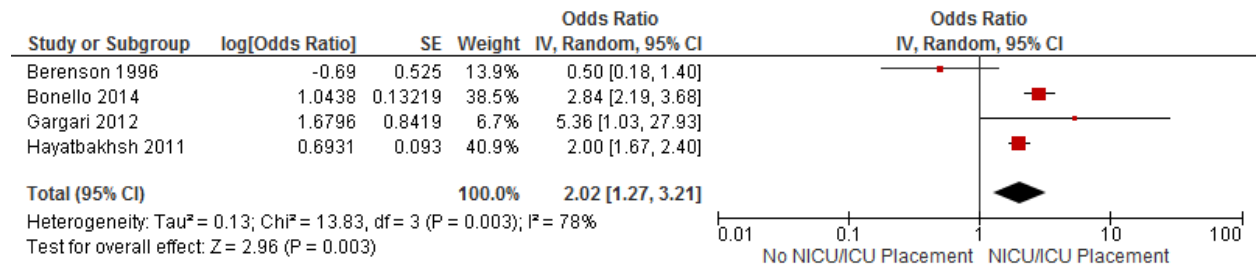

Supplement: bmjopen-2015-009986supp4.pdf [file bmjopen-2015-009986supp4.pdf]
